# Supplementary material for: Validation of a Harmonised, Three-Item Cognitive Screening Instrument for the Survey of Health, Ageing and Retirement in Europe (SHARE-Cog)
Source: MDPI journal article supplement (doi:10.3390/ijerph20196869), 2023-09-30
Supplement: s1 [file s1]

## SHARE-Cog assessment

Name: \_\_\_\_\_

Sex: \_\_\_\_\_

Date: \_\_\_\_\_

Date of birth: \_\_\_\_\_

Education: \_\_\_\_\_

Note: \_\_\_\_\_

### WORD REGISTRATION

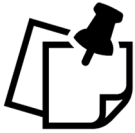

"Now, I am going to read a list of words. We have purposely made the list long so it will be difficult for anyone to recall all the words. Most people recall just a few. Please listen carefully, as the set of words cannot be repeated. When I have finished, I will ask you to recall aloud as many of the words as you can, in any order. Is this clear?"

- Select 1 of the 4 lists

"Ready?" [Read out one of the four lists below]

"Now please tell me all the words you can recall."

- Allow up to one minute for recall

SCORE AS 1 POINT PER  
WORD CORRECT.

TOTAL SCORE:

/10

| Word list<br>option 1 | tick | Word list<br>option 2 | tick | Word list<br>option 3 | tick | Word list<br>option 4 | tick |
|-----------------------|------|-----------------------|------|-----------------------|------|-----------------------|------|
| Hotel                 |      | Sky                   |      | Woman                 |      | Water                 |      |
| River                 |      | Ocean                 |      | Rock                  |      | Church                |      |
| Tree                  |      | Flag                  |      | Blood                 |      | Doctor                |      |
| Skin                  |      | Dollar                |      | Corner                |      | Palace                |      |
| Gold                  |      | Wife                  |      | Shoes                 |      | Fire                  |      |
| Market                |      | Machine               |      | Letter                |      | Garden                |      |
| Paper                 |      | Home                  |      | Girl                  |      | Sea                   |      |
| Child                 |      | Earth                 |      | House                 |      | Village               |      |
| King                  |      | College               |      | Valley                |      | Baby                  |      |
| Book                  |      | Butter                |      | Engine                |      | Table                 |      |

### VERBAL FLUENCY

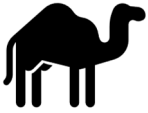

"Now I would like you to name as many different animals as you can think of. You have one minute to do this. Ready, go."

- Allow one minute precisely. If the respondent stops before the end of the time, encourage him/her to try to find more words. If he/she is silent for 15 seconds repeat the basic instruction ('I want you to tell me all the animals you can think of'). No extension on the time limit is made in the event that the instruction has to be repeated.
- The score is the sum of acceptable animals. Any member of the animal kingdom, real or mythical is scored correct, except repetitions and proper nouns. Specifically each of the following gets credit: a species name and any accompanying breeds within the species; male, female and infant names within the species (max 40).

SCORE AS ½ POINT  
PER ANIMAL NAMED  
(ROUNDED).

TOTAL SCORE:

/15

### WORD RECALL

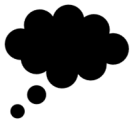

"A little while ago, I read you a list of words and you repeated the ones you could remember. Please tell me any of the words that you can remember now?"

- Allow up to one minute for recall.

SCORE AS 2 POINTS  
PER CORRECT  
WORD.

TOTAL SCORE:

/20

| Word list<br>option 1 | tick | Word list<br>option 2 | tick | Word list<br>option 3 | tick | Word list<br>option 4 | tick |
|-----------------------|------|-----------------------|------|-----------------------|------|-----------------------|------|
| Hotel                 |      | Sky                   |      | Woman                 |      | Water                 |      |
| River                 |      | Ocean                 |      | Rock                  |      | Church                |      |
| Tree                  |      | Flag                  |      | Blood                 |      | Doctor                |      |
| Skin                  |      | Dollar                |      | Corner                |      | Palace                |      |
| Gold                  |      | Wife                  |      | Shoes                 |      | Fire                  |      |
| Market                |      | Machine               |      | Letter                |      | Garden                |      |
| Paper                 |      | Home                  |      | Girl                  |      | Sea                   |      |
| Child                 |      | Earth                 |      | House                 |      | Village               |      |
| King                  |      | College               |      | Valley                |      | Baby                  |      |
| Book                  |      | Butter                |      | Engine                |      | Table                 |      |

| Word Registration | Verbal Fluency | Word Recall | Total Score |
|-------------------|----------------|-------------|-------------|
| /10               | /15            | /20         | /45         |
