# Supplementary material for: Validation of a Harmonised, Three-Item Cognitive Screening Instrument for the Survey of Health, Ageing and Retirement in Europe (SHARE-Cog)
Source: MDPI journal article supplement (doi:10.3390/ijerph20196869), 2023-09-30
Supplement: s1 [file s1]

# Supplementary material

**Table S1.** Details on the age- and education- specific cut-offs for MCI and dementia that were obtained from the MoCA-based cognitive test battery.

| Education level | Age group | Number<br>(n=23,832) | Mean cognitive<br>battery score | SD<br>cognitive<br>battery<br>score | MCI cutoff<br>(1 SD below<br>the mean) | Dementia<br>cut-off (2<br>SDs below<br>the mean) | Values<br>included<br>(Dementia) | Percentage<br>in this<br>range | Values<br>included<br>(MCI) | Percentage<br>in this<br>range | Values<br>included<br>(SMC/NC) | Percentage in<br>this range |
|-----------------|-----------|----------------------|---------------------------------|-------------------------------------|----------------------------------------|--------------------------------------------------|----------------------------------|--------------------------------|-----------------------------|--------------------------------|--------------------------------|-----------------------------|
| Low             | 85+       | 1125                 | 12.11                           | 3.05                                | ≤ 9.06                                 | ≤ 6.01                                           | 0–6                              | 6%                             | 7, 8, 9                     | 15%                            | 10–16                          | 81%                         |
| Low             | 75-84     | 3417                 | 13.24                           | 2.52                                | ≤ 10.72                                | ≤ 8.2                                            | 0–8                              | 6%                             | 9, 10                       | 8%                             | 11–16                          | 86%                         |
| Low             | 65-74     | 4106                 | 14.15                           | 2.05                                | ≤ 12.1                                 | ≤ 10.04                                          | 0–10                             | 6%                             | 11, 12                      | 11%                            | 13–16                          | 83%                         |
| Medium          | 85+       | 623                  | 13.56                           | 2.41                                | ≤ 11.15                                | ≤ 8.75                                           | 0–8                              | 5%                             | 9, 10, 11                   | 10%                            | 12–16                          | 85%                         |
| Medium          | 75-84     | 3072                 | 14.51                           | 1.75                                | ≤ 12.76                                | ≤ 11.01                                          | 0–11                             | 6%                             | 12                          | 9%                             | 13–16                          | 88%                         |
| Medium          | 65-74     | 5711                 | 15.03                           | 1.33                                | ≤ 13.69                                | ≤ 12.36                                          | 0–12                             | 4%                             | 13                          | 7%                             | 14, 15, 16                     | 89%                         |
| High            | 85+       | 406                  | 14.41                           | 1.77                                | ≤ 12.64                                | ≤ 10.87                                          | 0–10                             | 4%                             | 11, 12                      | 10%                            | 13–16                          | 86%                         |
| High            | 75-84     | 1878                 | 14.99                           | 1.44                                | ≤ 13.55                                | ≤ 12.11                                          | 0–12                             | 6%                             | 13                          | 6%                             | 14, 15, 16                     | 88%                         |
| High            | 65-74     | 3494                 | 15.33                           | 1.14                                | ≤ 14.19                                | ≤ 13.05                                          | 0–13                             | 6%                             | 14                          | 10%                            | 15, 16                         | 85%                         |

**Table S2.** Details on those who were excluded from the analyses due to their cognitive diagnostic group being too unclear/contradictory including the numbers and rational.

| Diagnostic category       | Number of participants (primary analysis) | Memory disease diagnosis <sup>1</sup> | Objective deficit (cutoff range) <sup>2</sup> | IADL status (difficulties reported) <sup>3</sup> | SMC (Memory rated “fair” / “poor”) <sup>4</sup> | Rational for inclusion/exclusion              | Number of participants (Sensitivity analysis 1) | Number of participants (Sensitivity analysis 2) | Number of participants (Sensitivity analysis 3) |
|---------------------------|-------------------------------------------|---------------------------------------|-----------------------------------------------|--------------------------------------------------|-------------------------------------------------|-----------------------------------------------|-------------------------------------------------|-------------------------------------------------|-------------------------------------------------|
| <b>Dementia</b>           | 62                                        | Yes                                   | Dementia                                      | Yes                                              | -                                               | Met all criteria for dementia                 | -                                               | 84                                              | 81                                              |
| <b>Unclear/excluded</b>   | <b>48</b>                                 | Yes                                   | <b>Dementia</b>                               | <b>No</b>                                        | -                                               | <b>IADL difficulties needed for dementia</b>  | -                                               | <b>26</b>                                       | <b>29</b>                                       |
| <b>Dementia</b>           | 23                                        | Yes                                   | MCI                                           | Yes                                              | -                                               | IADL difficulties suggests dementia           | -                                               | 39                                              | 38                                              |
| <b>MCI</b>                | 27                                        | Yes                                   | MCI                                           | No                                               | -                                               | Met all criteria for MCI                      | -                                               | 11                                              | 12                                              |
| <b>Dementia</b>           | 64                                        | Yes                                   | Normal                                        | Yes                                              | -                                               | IADL difficulties suggests dementia           | -                                               | 123                                             | 100                                             |
| <b>MCI</b>                | 140                                       | Yes                                   | Normal                                        | No                                               | -                                               | Disease diagnosis suggests MCI                | -                                               | 81                                              | 104                                             |
| <b>Dementia</b>           | 130                                       | No                                    | Dementia                                      | Yes                                              | Yes                                             | Met all criteria for dementia                 | 130                                             | 284                                             | 246                                             |
| <b>Dementia</b>           | 56                                        | No                                    | Dementia                                      | Yes                                              | No                                              | Met all criteria for dementia                 | 56                                              | 159                                             | 128                                             |
| <b>Unclear/excluded</b>   | <b>440</b>                                | No                                    | <b>Dementia</b>                               | <b>No</b>                                        | Yes                                             | <b>IADLs difficulties needed for dementia</b> | <b>440</b>                                      | <b>286</b>                                      | <b>324</b>                                      |
| <b>Unclear/excluded</b>   | <b>591</b>                                | No                                    | <b>Dementia</b>                               | <b>No</b>                                        | No                                              | <b>IADLs difficulties needed for dementia</b> | <b>591</b>                                      | <b>488</b>                                      | <b>519</b>                                      |
| <b>Unclear/excluded</b>   | <b>112</b>                                | No                                    | MCI                                           | <b>Yes</b>                                       | Yes                                             | <b>No IADL difficulties in MCI</b>            | <b>112</b>                                      | <b>286</b>                                      | <b>238</b>                                      |
| <b>Unclear/excluded</b>   | <b>71</b>                                 | No                                    | MCI                                           | <b>Yes</b>                                       | No                                              | <b>No IADL difficulties and SMC in MCI</b>    | <b>71</b>                                       | <b>251</b>                                      | <b>186</b>                                      |
| <b>MCI</b>                | 611                                       | No                                    | MCI                                           | No                                               | Yes                                             | Met all criteria for MCI                      | 611                                             | 437                                             | 485                                             |
| <b>Unclear/excluded</b>   | <b>1132</b>                               | No                                    | MCI                                           | No                                               | No                                              | <b>SMC needed for MCI</b>                     | <b>1132</b>                                     | <b>952</b>                                      | <b>1017</b>                                     |
| <b>Unclear/excluded</b>   | <b>370</b>                                | No                                    | Normal                                        | <b>Yes</b>                                       | Yes                                             | <b>No IADL difficulties in NC</b>             | <b>370</b>                                      | <b>1433</b>                                     | <b>1033</b>                                     |
| <b>Unclear/excluded</b>   | <b>316</b>                                | No                                    | Normal                                        | <b>Yes</b>                                       | No                                              | <b>No IADL difficulties in NC</b>             | <b>316</b>                                      | <b>2083</b>                                     | <b>1337</b>                                     |
| <b>SMC</b>                | 4957                                      | No                                    | Normal                                        | No                                               | Yes                                             | Met all criteria for SMC                      | 4957                                            | 3894                                            | 4294                                            |
| <b>NC</b>                 | 14,682                                    | No                                    | Normal                                        | No                                               | No                                              | Met all criteria for NC                       | 14,682                                          | 12,915                                          | 13,661                                          |
| <b>Total participants</b> | <b>20,752</b>                             | -                                     | -                                             | -                                                | -                                               | -                                             | <b>20,436</b>                                   | <b>18,027</b>                                   | <b>19,149</b>                                   |

Note Sensitivity analysis 2 and Sensitivity analysis 3 defined IADL status differently (details in Table S5).

<sup>1</sup>Self-reported doctor diagnosis of “dementia... or any other serious memory problem”. The question also entails that they are being “treated for or bothered by” the condition.

<sup>2</sup> Age and education specific cut-off applied to a cognitive battery of tests. Dementia was defined as  $\leq$  “SDs below the mean, MCI as between 1 SD and 2 SDs below the mean and normal  $\geq$  1 SD below the mean.

<sup>3</sup> Three instrumental activities of daily living (IADLs) were considered: telephone calls, taking medications and managing finances.

<sup>4</sup> Those who reported a “serious memory impairment” diagnosis were considered to have a subjective memory complaint.

**Table S3.** Assessments of the impact of reducing maximum number of animals in the verbal fluency subtest on the overall model (registration, verbal fluency and recall) performance including the overall model fit measured using the pseudo R-squared ( $R_E^2$ ) value and overall diagnostic accuracy of the model measured using the area under the ROC curve (AUC).

| Comparison         | All 100 animals<br>( $R_E^2$ ) | Max 60 animals<br>( $R_E^2$ ) | Max 40 animals<br>( $R_E^2$ ) | Max 30 animals<br>( $R_E^2$ ) | Max 20 animals<br>( $R_E^2$ ) | Max 10 animals<br>( $R_E^2$ ) |
|--------------------|--------------------------------|-------------------------------|-------------------------------|-------------------------------|-------------------------------|-------------------------------|
| D_MCI_v_SMC_NC     | 0.140                          | 0.140                         | 0.140                         | 0.141                         | 0.143                         | 0.134                         |
| (D+MCI) vs (NC)    | 0.199                          | 0.199                         | 0.199                         | 0.199                         | 0.200                         | 0.186                         |
| MCI vs D           | 0.212                          | 0.212                         | 0.212                         | 0.212                         | 0.217                         | 0.213                         |
| MCI vs (SMC+NC)    | 0.053                          | 0.053                         | 0.053                         | 0.053                         | 0.052                         | 0.045                         |
| MCI vs NC          | 0.091                          | 0.091                         | 0.091                         | 0.091                         | 0.089                         | 0.079                         |
| D vs (MCI+ SMC+NC) | 0.211                          | 0.211                         | 0.211                         | 0.211                         | 0.214                         | 0.203                         |
| Comparison         | All 100 animals<br>(AUC)       | Max 60 animals<br>(AUC)       | Max 40 animals<br>(AUC)       | Max 30 animals<br>(AUC)       | Max 20 animals<br>(AUC)       | Max 10 animals<br>(AUC)       |
| D_MCI_v_SMC_NC     | 0.772                          | 0.772                         | 0.772                         | 0.772                         | 0.758                         | 0.608                         |
| (D+MCI) vs (NC)    | 0.786                          | 0.786                         | 0.786                         | 0.786                         | 0.771                         | 0.610                         |
| MCI vs D           | 0.740                          | 0.740                         | 0.740                         | 0.740                         | 0.739                         | 0.682                         |
| MCI vs (SMC+NC)    | 0.726                          | 0.726                         | 0.726                         | 0.726                         | 0.710                         | 0.556                         |
| MCI vs NC          | 0.743                          | 0.743                         | 0.743                         | 0.743                         | 0.725                         | 0.558                         |
| D vs (MCI+ SMC+NC) | 0.873                          | 0.873                         | 0.873                         | 0.873                         | 0.864                         | 0.727                         |

\*Highest and lowest scores (at three decimal places) are marked in blue and red respectively.

**Table S4.** Diagnostic accuracy for all unique weighting combinations (n=291) obtained from varying the weightings of the three SHARE-Cog subtests (word registration, verbal fluency and word recall) between 0.5, 1, 2, 3, and 4 points per word and by changing the maximum number of animals in the verbal fluency subtest between 20, 30 and 40.

| Verbal fluency            | Ratio of subtest scores |                |             | Total points      |                |             |             | Diagnostic accuracy (AUC values) |               |          |                 |           |                   |                   |
|---------------------------|-------------------------|----------------|-------------|-------------------|----------------|-------------|-------------|----------------------------------|---------------|----------|-----------------|-----------|-------------------|-------------------|
| Maximum number of animals | Word registration       | Verbal fluency | Word recall | Word registration | Verbal fluency | Word recall | Total score | (D+MCI) vs (SMC+NC)              | (D+MCI) vs NC | MCI vs D | MCI vs (SMC+NC) | MCI vs NC | D vs (MCI+SMC+NC) | Average AUC value |

|    |      |     |      |    |    |    |    |       |       |       |       |       |       |       |
|----|------|-----|------|----|----|----|----|-------|-------|-------|-------|-------|-------|-------|
| 40 | 0.5  | 0.5 | 1.5  | 5  | 20 | 15 | 40 | 0.811 | 0.831 | 0.758 | 0.766 | 0.79  | 0.909 | 0.811 |
| 40 | 1    | 0.5 | 1.5  | 10 | 20 | 15 | 45 | 0.81  | 0.831 | 0.76  | 0.766 | 0.789 | 0.908 | 0.811 |
| 30 | 1    | 0.5 | 1.5  | 10 | 15 | 15 | 40 | 0.81  | 0.831 | 0.76  | 0.766 | 0.789 | 0.908 | 0.811 |
| 30 | 0.5  | 0.5 | 1.5  | 5  | 15 | 15 | 35 | 0.811 | 0.831 | 0.758 | 0.766 | 0.79  | 0.909 | 0.811 |
| 40 | 1    | 0.5 | 2    | 10 | 20 | 20 | 50 | 0.81  | 0.831 | 0.756 | 0.766 | 0.79  | 0.907 | 0.81  |
| 40 | 0.75 | 0.5 | 1    | 8  | 20 | 10 | 38 | 0.809 | 0.829 | 0.763 | 0.764 | 0.787 | 0.908 | 0.81  |
| 40 | 1.5  | 0.5 | 1.5  | 15 | 20 | 15 | 50 | 0.809 | 0.83  | 0.76  | 0.765 | 0.789 | 0.908 | 0.81  |
| 30 | 0.75 | 0.5 | 1    | 8  | 15 | 10 | 32 | 0.809 | 0.829 | 0.763 | 0.764 | 0.787 | 0.908 | 0.81  |
| 30 | 1    | 0.5 | 2    | 10 | 15 | 20 | 45 | 0.81  | 0.831 | 0.756 | 0.766 | 0.79  | 0.907 | 0.81  |
| 30 | 1.5  | 0.5 | 1.5  | 15 | 15 | 15 | 45 | 0.809 | 0.83  | 0.76  | 0.764 | 0.789 | 0.908 | 0.81  |
| 40 | 1.5  | 0.5 | 2    | 15 | 20 | 20 | 55 | 0.81  | 0.83  | 0.756 | 0.765 | 0.79  | 0.907 | 0.81  |
| 40 | 0.5  | 0.5 | 2    | 5  | 20 | 20 | 45 | 0.81  | 0.831 | 0.753 | 0.766 | 0.789 | 0.907 | 0.809 |
| 40 | 1.5  | 0.5 | 1    | 15 | 20 | 10 | 45 | 0.809 | 0.829 | 0.761 | 0.764 | 0.788 | 0.906 | 0.809 |
| 30 | 1.5  | 0.5 | 2    | 15 | 15 | 20 | 50 | 0.809 | 0.83  | 0.756 | 0.765 | 0.789 | 0.906 | 0.809 |
| 30 | 0.5  | 0.5 | 2    | 5  | 15 | 20 | 40 | 0.81  | 0.83  | 0.753 | 0.765 | 0.789 | 0.907 | 0.809 |
| 30 | 1    | 0.5 | 0.75 | 10 | 15 | 8  | 32 | 0.808 | 0.828 | 0.763 | 0.763 | 0.786 | 0.907 | 0.809 |
| 40 | 0.5  | 1   | 3    | 5  | 40 | 30 | 75 | 0.81  | 0.83  | 0.754 | 0.765 | 0.789 | 0.907 | 0.809 |
| 30 | 1.5  | 0.5 | 1    | 15 | 15 | 10 | 40 | 0.808 | 0.829 | 0.76  | 0.764 | 0.788 | 0.906 | 0.809 |
| 40 | 1    | 0.5 | 0.75 | 10 | 20 | 8  | 38 | 0.808 | 0.828 | 0.763 | 0.763 | 0.786 | 0.907 | 0.809 |
| 40 | 0.5  | 1   | 4    | 5  | 40 | 40 | 85 | 0.81  | 0.831 | 0.751 | 0.766 | 0.79  | 0.907 | 0.809 |
| 30 | 0.5  | 1   | 3    | 5  | 30 | 30 | 65 | 0.81  | 0.83  | 0.754 | 0.765 | 0.789 | 0.907 | 0.809 |
| 30 | 1    | 0.5 | 1    | 10 | 15 | 10 | 35 | 0.808 | 0.828 | 0.761 | 0.763 | 0.787 | 0.907 | 0.809 |
| 40 | 1    | 0.5 | 1    | 10 | 20 | 10 | 40 | 0.808 | 0.828 | 0.762 | 0.763 | 0.787 | 0.907 | 0.809 |
| 30 | 0.5  | 1   | 4    | 5  | 30 | 40 | 75 | 0.81  | 0.831 | 0.751 | 0.766 | 0.79  | 0.907 | 0.809 |
| 40 | 2    | 0.5 | 1.5  | 20 | 20 | 15 | 55 | 0.808 | 0.829 | 0.76  | 0.763 | 0.787 | 0.906 | 0.809 |
| 30 | 2    | 0.5 | 1.5  | 20 | 15 | 15 | 50 | 0.808 | 0.828 | 0.76  | 0.763 | 0.787 | 0.906 | 0.809 |
| 40 | 2    | 0.5 | 2    | 20 | 20 | 20 | 60 | 0.808 | 0.829 | 0.757 | 0.764 | 0.788 | 0.906 | 0.809 |
| 30 | 0.75 | 0.5 | 0.75 | 8  | 15 | 8  | 30 | 0.808 | 0.827 | 0.762 | 0.763 | 0.786 | 0.906 | 0.809 |
| 40 | 0.75 | 0.5 | 0.75 | 8  | 20 | 8  | 35 | 0.808 | 0.827 | 0.762 | 0.763 | 0.785 | 0.906 | 0.809 |
| 30 | 2    | 0.5 | 2    | 20 | 15 | 20 | 55 | 0.808 | 0.829 | 0.757 | 0.763 | 0.788 | 0.906 | 0.808 |
| 40 | 2    | 0.5 | 1    | 20 | 20 | 10 | 50 | 0.807 | 0.827 | 0.761 | 0.762 | 0.786 | 0.906 | 0.808 |

|    |      |     |      |    |    |    |     |       |       |       |       |       |       |       |
|----|------|-----|------|----|----|----|-----|-------|-------|-------|-------|-------|-------|-------|
| 30 | 0.5  | 0.5 | 1    | 5  | 15 | 10 | 30  | 0.808 | 0.828 | 0.757 | 0.763 | 0.786 | 0.907 | 0.808 |
| 30 | 0.5  | 1   | 2    | 5  | 30 | 20 | 55  | 0.808 | 0.827 | 0.757 | 0.764 | 0.786 | 0.906 | 0.808 |
| 30 | 2    | 0.5 | 1    | 20 | 15 | 10 | 45  | 0.807 | 0.827 | 0.761 | 0.762 | 0.786 | 0.906 | 0.808 |
| 40 | 0.5  | 1   | 2    | 5  | 40 | 20 | 65  | 0.808 | 0.827 | 0.757 | 0.764 | 0.786 | 0.906 | 0.808 |
| 40 | 0.5  | 0.5 | 1    | 5  | 20 | 10 | 35  | 0.808 | 0.827 | 0.757 | 0.763 | 0.786 | 0.907 | 0.808 |
| 20 | 1    | 0.5 | 1.5  | 10 | 10 | 15 | 35  | 0.807 | 0.827 | 0.76  | 0.761 | 0.785 | 0.906 | 0.808 |
| 40 | 2    | 0.5 | 3    | 20 | 20 | 30 | 70  | 0.808 | 0.829 | 0.753 | 0.763 | 0.788 | 0.905 | 0.808 |
| 30 | 0.67 | 0.5 | 0.67 | 7  | 15 | 7  | 28  | 0.806 | 0.825 | 0.763 | 0.761 | 0.783 | 0.906 | 0.807 |
| 30 | 2    | 0.5 | 3    | 20 | 15 | 30 | 65  | 0.807 | 0.829 | 0.753 | 0.763 | 0.788 | 0.904 | 0.807 |
| 20 | 0.75 | 0.5 | 1    | 8  | 10 | 10 | 28  | 0.806 | 0.825 | 0.763 | 0.76  | 0.784 | 0.906 | 0.807 |
| 40 | 0.67 | 0.5 | 0.67 | 7  | 20 | 7  | 33  | 0.806 | 0.825 | 0.763 | 0.761 | 0.783 | 0.906 | 0.807 |
| 40 | 1    | 0.5 | 3    | 10 | 20 | 30 | 60  | 0.808 | 0.829 | 0.75  | 0.763 | 0.788 | 0.905 | 0.807 |
| 30 | 1    | 0.5 | 3    | 10 | 15 | 30 | 55  | 0.807 | 0.829 | 0.75  | 0.763 | 0.788 | 0.904 | 0.807 |
| 30 | 0.5  | 0.5 | 0.75 | 5  | 15 | 8  | 28  | 0.806 | 0.825 | 0.76  | 0.761 | 0.784 | 0.904 | 0.807 |
| 40 | 0.5  | 0.5 | 0.75 | 5  | 20 | 8  | 32  | 0.806 | 0.825 | 0.76  | 0.761 | 0.784 | 0.904 | 0.807 |
| 30 | 0.5  | 2   | 4    | 5  | 60 | 40 | 105 | 0.807 | 0.826 | 0.756 | 0.762 | 0.785 | 0.905 | 0.807 |
| 20 | 0.5  | 1   | 2    | 5  | 20 | 20 | 45  | 0.806 | 0.825 | 0.759 | 0.76  | 0.783 | 0.907 | 0.807 |
| 40 | 0.5  | 2   | 4    | 5  | 80 | 40 | 125 | 0.807 | 0.826 | 0.756 | 0.762 | 0.784 | 0.905 | 0.807 |
| 40 | 1.5  | 0.5 | 0.5  | 15 | 20 | 5  | 40  | 0.805 | 0.824 | 0.765 | 0.759 | 0.782 | 0.905 | 0.807 |
| 20 | 1    | 0.5 | 1    | 10 | 10 | 10 | 30  | 0.805 | 0.825 | 0.762 | 0.759 | 0.783 | 0.906 | 0.807 |
| 30 | 0.75 | 0.5 | 0.5  | 8  | 15 | 5  | 28  | 0.805 | 0.824 | 0.764 | 0.76  | 0.782 | 0.905 | 0.807 |
| 20 | 0.75 | 0.5 | 0.75 | 8  | 10 | 8  | 25  | 0.805 | 0.824 | 0.764 | 0.759 | 0.782 | 0.907 | 0.807 |
| 20 | 1    | 0.5 | 0.75 | 10 | 10 | 8  | 28  | 0.805 | 0.825 | 0.763 | 0.759 | 0.782 | 0.906 | 0.807 |
| 20 | 0.5  | 0.5 | 0.75 | 5  | 10 | 8  | 22  | 0.805 | 0.825 | 0.762 | 0.76  | 0.783 | 0.905 | 0.807 |
| 40 | 0.5  | 0.5 | 3    | 5  | 20 | 30 | 55  | 0.808 | 0.829 | 0.747 | 0.764 | 0.788 | 0.905 | 0.807 |
| 30 | 1.5  | 0.5 | 0.5  | 15 | 15 | 5  | 35  | 0.805 | 0.824 | 0.765 | 0.759 | 0.782 | 0.905 | 0.807 |
| 40 | 0.75 | 0.5 | 0.5  | 8  | 20 | 5  | 32  | 0.805 | 0.824 | 0.764 | 0.76  | 0.782 | 0.905 | 0.807 |
| 20 | 0.5  | 0.5 | 1.5  | 5  | 10 | 15 | 30  | 0.806 | 0.825 | 0.759 | 0.759 | 0.782 | 0.908 | 0.806 |
| 30 | 0.5  | 0.5 | 0.67 | 5  | 15 | 7  | 27  | 0.806 | 0.824 | 0.761 | 0.76  | 0.782 | 0.905 | 0.806 |
| 40 | 0.5  | 0.5 | 0.67 | 5  | 20 | 7  | 32  | 0.806 | 0.824 | 0.761 | 0.76  | 0.782 | 0.905 | 0.806 |
| 30 | 0.5  | 1   | 1.5  | 5  | 30 | 15 | 50  | 0.806 | 0.824 | 0.76  | 0.761 | 0.783 | 0.905 | 0.806 |

|    |      |      |      |    |    |    |    |       |       |       |       |       |       |       |
|----|------|------|------|----|----|----|----|-------|-------|-------|-------|-------|-------|-------|
| 30 | 0.5  | 0.5  | 3    | 5  | 15 | 30 | 50 | 0.808 | 0.829 | 0.747 | 0.763 | 0.788 | 0.904 | 0.806 |
| 40 | 0.5  | 1    | 1.5  | 5  | 40 | 15 | 60 | 0.806 | 0.824 | 0.76  | 0.761 | 0.783 | 0.905 | 0.806 |
| 20 | 0.5  | 1    | 3    | 5  | 20 | 30 | 55 | 0.806 | 0.826 | 0.755 | 0.76  | 0.783 | 0.907 | 0.806 |
| 20 | 0.5  | 0.5  | 0.67 | 5  | 10 | 7  | 22 | 0.805 | 0.824 | 0.763 | 0.758 | 0.78  | 0.908 | 0.806 |
| 20 | 1    | 0.5  | 2    | 10 | 10 | 20 | 40 | 0.806 | 0.826 | 0.756 | 0.76  | 0.784 | 0.905 | 0.806 |
| 20 | 0.5  | 0.5  | 1    | 5  | 10 | 10 | 25 | 0.805 | 0.825 | 0.759 | 0.758 | 0.781 | 0.907 | 0.806 |
| 40 | 3    | 0.5  | 2    | 30 | 20 | 20 | 70 | 0.805 | 0.826 | 0.756 | 0.761 | 0.785 | 0.903 | 0.806 |
| 20 | 1.5  | 0.5  | 1.5  | 15 | 10 | 15 | 40 | 0.804 | 0.825 | 0.76  | 0.759 | 0.783 | 0.905 | 0.806 |
| 20 | 0.67 | 0.5  | 0.67 | 7  | 10 | 7  | 23 | 0.804 | 0.823 | 0.764 | 0.758 | 0.78  | 0.906 | 0.806 |
| 20 | 0.5  | 1    | 1.5  | 5  | 20 | 15 | 40 | 0.805 | 0.824 | 0.762 | 0.758 | 0.781 | 0.907 | 0.806 |
| 20 | 0.5  | 2    | 4    | 5  | 40 | 40 | 85 | 0.805 | 0.825 | 0.757 | 0.759 | 0.782 | 0.906 | 0.806 |
| 30 | 3    | 0.5  | 2    | 30 | 15 | 20 | 65 | 0.805 | 0.826 | 0.756 | 0.76  | 0.785 | 0.903 | 0.806 |
| 20 | 1.5  | 0.5  | 2    | 15 | 10 | 20 | 45 | 0.805 | 0.825 | 0.756 | 0.759 | 0.784 | 0.904 | 0.805 |
| 30 | 0.5  | 0.75 | 1    | 5  | 22 | 10 | 38 | 0.805 | 0.823 | 0.759 | 0.759 | 0.781 | 0.904 | 0.805 |
| 40 | 1    | 0.5  | 0.5  | 10 | 20 | 5  | 35 | 0.804 | 0.823 | 0.764 | 0.758 | 0.781 | 0.903 | 0.805 |
| 20 | 1.5  | 0.5  | 1    | 15 | 10 | 10 | 35 | 0.804 | 0.824 | 0.761 | 0.758 | 0.782 | 0.904 | 0.805 |
| 30 | 1    | 0.5  | 0.5  | 10 | 15 | 5  | 30 | 0.803 | 0.823 | 0.764 | 0.758 | 0.781 | 0.903 | 0.805 |
| 40 | 0.5  | 0.75 | 1    | 5  | 30 | 10 | 45 | 0.805 | 0.823 | 0.759 | 0.759 | 0.781 | 0.904 | 0.805 |
| 20 | 0.5  | 0.75 | 1    | 5  | 15 | 10 | 30 | 0.804 | 0.823 | 0.76  | 0.758 | 0.781 | 0.905 | 0.805 |
| 40 | 3    | 0.5  | 3    | 30 | 20 | 30 | 80 | 0.805 | 0.826 | 0.753 | 0.76  | 0.785 | 0.902 | 0.805 |
| 40 | 2    | 0.5  | 4    | 20 | 20 | 40 | 80 | 0.805 | 0.827 | 0.749 | 0.761 | 0.786 | 0.902 | 0.805 |
| 20 | 0.5  | 0.5  | 2    | 5  | 10 | 20 | 35 | 0.805 | 0.825 | 0.755 | 0.758 | 0.782 | 0.906 | 0.805 |
| 40 | 1    | 0.5  | 4    | 10 | 20 | 40 | 70 | 0.806 | 0.827 | 0.746 | 0.762 | 0.786 | 0.902 | 0.805 |
| 30 | 3    | 0.5  | 3    | 30 | 15 | 30 | 75 | 0.804 | 0.826 | 0.753 | 0.76  | 0.785 | 0.902 | 0.805 |
| 40 | 2    | 0.5  | 0.5  | 20 | 20 | 5  | 45 | 0.803 | 0.823 | 0.761 | 0.758 | 0.781 | 0.902 | 0.805 |
| 40 | 0.67 | 0.5  | 0.5  | 7  | 20 | 5  | 32 | 0.803 | 0.822 | 0.763 | 0.758 | 0.78  | 0.903 | 0.805 |
| 30 | 0.67 | 0.5  | 0.5  | 7  | 15 | 5  | 27 | 0.803 | 0.822 | 0.763 | 0.758 | 0.78  | 0.903 | 0.805 |
| 20 | 0.75 | 0.5  | 0.5  | 8  | 10 | 5  | 22 | 0.803 | 0.822 | 0.765 | 0.757 | 0.779 | 0.904 | 0.805 |
| 30 | 2    | 0.5  | 4    | 20 | 15 | 40 | 75 | 0.805 | 0.826 | 0.749 | 0.761 | 0.786 | 0.902 | 0.805 |
| 20 | 0.5  | 1    | 4    | 5  | 20 | 40 | 65 | 0.805 | 0.825 | 0.752 | 0.759 | 0.783 | 0.906 | 0.805 |
| 30 | 2    | 0.5  | 0.5  | 20 | 15 | 5  | 40 | 0.803 | 0.823 | 0.761 | 0.758 | 0.781 | 0.902 | 0.805 |

|    |      |      |      |    |    |    |     |       |       |       |       |       |       |       |
|----|------|------|------|----|----|----|-----|-------|-------|-------|-------|-------|-------|-------|
| 30 | 1    | 0.5  | 4    | 10 | 15 | 40 | 65  | 0.805 | 0.827 | 0.746 | 0.761 | 0.786 | 0.902 | 0.805 |
| 20 | 0.5  | 2    | 3    | 5  | 40 | 30 | 75  | 0.804 | 0.823 | 0.758 | 0.758 | 0.78  | 0.905 | 0.805 |
| 40 | 3    | 0.5  | 4    | 30 | 20 | 40 | 90  | 0.804 | 0.826 | 0.75  | 0.76  | 0.785 | 0.901 | 0.804 |
| 30 | 0.5  | 2    | 3    | 5  | 60 | 30 | 95  | 0.804 | 0.823 | 0.756 | 0.759 | 0.781 | 0.903 | 0.804 |
| 20 | 0.5  | 1.5  | 2    | 5  | 30 | 20 | 55  | 0.803 | 0.822 | 0.759 | 0.757 | 0.779 | 0.905 | 0.804 |
| 20 | 2    | 0.5  | 1.5  | 20 | 10 | 15 | 45  | 0.802 | 0.823 | 0.76  | 0.756 | 0.781 | 0.903 | 0.804 |
| 40 | 3    | 1    | 0.5  | 30 | 40 | 5  | 75  | 0.802 | 0.821 | 0.765 | 0.756 | 0.778 | 0.903 | 0.804 |
| 20 | 2    | 0.5  | 2    | 20 | 10 | 20 | 50  | 0.803 | 0.824 | 0.757 | 0.757 | 0.782 | 0.903 | 0.804 |
| 30 | 3    | 1    | 0.5  | 30 | 30 | 5  | 65  | 0.802 | 0.821 | 0.765 | 0.756 | 0.779 | 0.903 | 0.804 |
| 40 | 0.5  | 2    | 3    | 5  | 80 | 30 | 115 | 0.804 | 0.822 | 0.756 | 0.759 | 0.78  | 0.903 | 0.804 |
| 30 | 3    | 0.5  | 4    | 30 | 15 | 40 | 85  | 0.804 | 0.825 | 0.75  | 0.76  | 0.785 | 0.901 | 0.804 |
| 20 | 0.5  | 0.67 | 0.67 | 5  | 13 | 7  | 25  | 0.803 | 0.821 | 0.761 | 0.757 | 0.779 | 0.903 | 0.804 |
| 40 | 0.5  | 0.5  | 4    | 5  | 20 | 40 | 65  | 0.805 | 0.826 | 0.743 | 0.761 | 0.786 | 0.902 | 0.804 |
| 20 | 0.67 | 0.5  | 0.5  | 7  | 10 | 5  | 22  | 0.801 | 0.82  | 0.765 | 0.755 | 0.778 | 0.903 | 0.804 |
| 30 | 0.5  | 0.5  | 4    | 5  | 15 | 40 | 60  | 0.805 | 0.826 | 0.743 | 0.761 | 0.785 | 0.901 | 0.804 |
| 30 | 0.5  | 1.5  | 2    | 5  | 45 | 20 | 70  | 0.803 | 0.822 | 0.757 | 0.758 | 0.78  | 0.902 | 0.804 |
| 20 | 2    | 0.5  | 1    | 20 | 10 | 10 | 40  | 0.801 | 0.822 | 0.761 | 0.755 | 0.779 | 0.903 | 0.804 |
| 40 | 4    | 0.5  | 3    | 40 | 20 | 30 | 90  | 0.803 | 0.824 | 0.752 | 0.758 | 0.783 | 0.901 | 0.804 |
| 40 | 0.5  | 1.5  | 2    | 5  | 60 | 20 | 85  | 0.803 | 0.821 | 0.757 | 0.758 | 0.779 | 0.902 | 0.804 |
| 40 | 3    | 0.5  | 1    | 30 | 20 | 10 | 60  | 0.802 | 0.822 | 0.758 | 0.757 | 0.781 | 0.901 | 0.804 |
| 20 | 0.5  | 0.75 | 0.75 | 5  | 15 | 8  | 28  | 0.802 | 0.821 | 0.761 | 0.756 | 0.778 | 0.904 | 0.803 |
| 30 | 2    | 1    | 0.5  | 20 | 30 | 5  | 55  | 0.801 | 0.82  | 0.765 | 0.755 | 0.777 | 0.902 | 0.803 |
| 40 | 2    | 1    | 0.5  | 20 | 40 | 5  | 65  | 0.801 | 0.82  | 0.765 | 0.755 | 0.777 | 0.902 | 0.803 |
| 30 | 0.5  | 0.67 | 0.67 | 5  | 20 | 7  | 32  | 0.802 | 0.82  | 0.76  | 0.757 | 0.779 | 0.902 | 0.803 |
| 30 | 3    | 0.5  | 1    | 30 | 15 | 10 | 55  | 0.802 | 0.822 | 0.758 | 0.756 | 0.781 | 0.901 | 0.803 |
| 30 | 4    | 0.5  | 3    | 40 | 15 | 30 | 85  | 0.803 | 0.824 | 0.752 | 0.758 | 0.783 | 0.9   | 0.803 |
| 20 | 0.5  | 0.5  | 0.5  | 5  | 10 | 5  | 20  | 0.802 | 0.821 | 0.761 | 0.756 | 0.778 | 0.902 | 0.803 |
| 40 | 0.5  | 0.67 | 0.67 | 5  | 27 | 7  | 38  | 0.802 | 0.82  | 0.76  | 0.757 | 0.778 | 0.902 | 0.803 |
| 20 | 1.5  | 0.5  | 0.5  | 15 | 10 | 5  | 30  | 0.8   | 0.82  | 0.765 | 0.754 | 0.778 | 0.902 | 0.803 |
| 30 | 0.5  | 0.5  | 0.5  | 5  | 15 | 5  | 25  | 0.802 | 0.821 | 0.76  | 0.757 | 0.779 | 0.901 | 0.803 |
| 20 | 0.5  | 3    | 4    | 5  | 60 | 40 | 105 | 0.803 | 0.821 | 0.757 | 0.756 | 0.778 | 0.904 | 0.803 |

|    |      |      |      |    |     |    |     |       |       |       |       |       |       |       |
|----|------|------|------|----|-----|----|-----|-------|-------|-------|-------|-------|-------|-------|
| 30 | 1    | 0.75 | 0.5  | 10 | 22  | 5  | 38  | 0.801 | 0.82  | 0.763 | 0.756 | 0.777 | 0.902 | 0.803 |
| 40 | 0.5  | 0.5  | 0.5  | 5  | 20  | 5  | 30  | 0.802 | 0.82  | 0.76  | 0.757 | 0.778 | 0.901 | 0.803 |
| 40 | 1    | 0.75 | 0.5  | 10 | 30  | 5  | 45  | 0.801 | 0.819 | 0.763 | 0.756 | 0.777 | 0.902 | 0.803 |
| 20 | 2    | 0.5  | 3    | 20 | 10  | 30 | 60  | 0.802 | 0.823 | 0.753 | 0.757 | 0.782 | 0.901 | 0.803 |
| 40 | 4    | 1    | 0.5  | 40 | 40  | 5  | 85  | 0.801 | 0.82  | 0.763 | 0.755 | 0.778 | 0.901 | 0.803 |
| 30 | 0.5  | 0.75 | 0.75 | 5  | 22  | 8  | 35  | 0.802 | 0.82  | 0.759 | 0.757 | 0.778 | 0.902 | 0.803 |
| 40 | 4    | 0.5  | 4    | 40 | 20  | 40 | 100 | 0.802 | 0.824 | 0.75  | 0.758 | 0.783 | 0.9   | 0.803 |
| 30 | 4    | 1    | 0.5  | 40 | 30  | 5  | 75  | 0.8   | 0.82  | 0.763 | 0.755 | 0.778 | 0.901 | 0.803 |
| 30 | 0.67 | 0.67 | 0.5  | 7  | 20  | 5  | 32  | 0.801 | 0.819 | 0.762 | 0.756 | 0.777 | 0.902 | 0.803 |
| 40 | 0.67 | 0.67 | 0.5  | 7  | 27  | 5  | 38  | 0.801 | 0.819 | 0.762 | 0.756 | 0.777 | 0.902 | 0.803 |
| 40 | 0.5  | 0.75 | 0.75 | 5  | 30  | 8  | 42  | 0.802 | 0.82  | 0.759 | 0.756 | 0.778 | 0.902 | 0.803 |
| 40 | 4    | 0.5  | 2    | 40 | 20  | 20 | 80  | 0.802 | 0.823 | 0.754 | 0.757 | 0.781 | 0.9   | 0.803 |
| 20 | 1    | 0.5  | 3    | 10 | 10  | 30 | 50  | 0.802 | 0.823 | 0.75  | 0.757 | 0.782 | 0.902 | 0.803 |
| 20 | 0.67 | 0.67 | 0.5  | 7  | 13  | 5  | 25  | 0.801 | 0.819 | 0.762 | 0.755 | 0.777 | 0.901 | 0.803 |
| 20 | 1    | 0.5  | 0.5  | 10 | 10  | 5  | 25  | 0.8   | 0.819 | 0.765 | 0.753 | 0.776 | 0.903 | 0.803 |
| 20 | 1    | 0.75 | 0.5  | 10 | 15  | 5  | 30  | 0.8   | 0.819 | 0.764 | 0.754 | 0.776 | 0.902 | 0.803 |
| 30 | 4    | 0.5  | 4    | 40 | 15  | 40 | 95  | 0.802 | 0.824 | 0.75  | 0.758 | 0.783 | 0.9   | 0.803 |
| 30 | 4    | 0.5  | 2    | 40 | 15  | 20 | 75  | 0.801 | 0.822 | 0.754 | 0.756 | 0.781 | 0.9   | 0.802 |
| 30 | 0.5  | 3    | 4    | 5  | 90  | 40 | 135 | 0.802 | 0.82  | 0.754 | 0.757 | 0.779 | 0.901 | 0.802 |
| 20 | 0.5  | 1    | 1    | 5  | 20  | 10 | 35  | 0.801 | 0.819 | 0.759 | 0.754 | 0.776 | 0.903 | 0.802 |
| 40 | 0.5  | 3    | 4    | 5  | 120 | 40 | 165 | 0.802 | 0.82  | 0.754 | 0.757 | 0.778 | 0.901 | 0.802 |
| 20 | 0.75 | 0.75 | 0.5  | 8  | 15  | 5  | 28  | 0.8   | 0.819 | 0.762 | 0.754 | 0.776 | 0.901 | 0.802 |
| 20 | 0.5  | 0.5  | 3    | 5  | 10  | 30 | 45  | 0.802 | 0.823 | 0.747 | 0.756 | 0.78  | 0.902 | 0.802 |
| 30 | 0.75 | 0.75 | 0.5  | 8  | 22  | 5  | 35  | 0.8   | 0.818 | 0.761 | 0.755 | 0.776 | 0.9   | 0.801 |
| 20 | 3    | 0.5  | 2    | 30 | 10  | 20 | 60  | 0.8   | 0.82  | 0.756 | 0.754 | 0.778 | 0.9   | 0.801 |
| 20 | 0.5  | 1.5  | 1.5  | 5  | 30  | 15 | 50  | 0.8   | 0.819 | 0.758 | 0.754 | 0.776 | 0.902 | 0.801 |
| 40 | 0.75 | 0.75 | 0.5  | 8  | 30  | 5  | 42  | 0.8   | 0.818 | 0.761 | 0.755 | 0.776 | 0.9   | 0.801 |
| 30 | 1.5  | 1    | 0.5  | 15 | 30  | 5  | 50  | 0.8   | 0.818 | 0.761 | 0.754 | 0.775 | 0.9   | 0.801 |
| 20 | 0.5  | 1    | 0.75 | 5  | 20  | 8  | 32  | 0.8   | 0.818 | 0.76  | 0.754 | 0.775 | 0.901 | 0.801 |
| 40 | 1.5  | 1    | 0.5  | 15 | 40  | 5  | 60  | 0.799 | 0.818 | 0.761 | 0.754 | 0.775 | 0.9   | 0.801 |
| 30 | 4    | 2    | 0.5  | 40 | 60  | 5  | 105 | 0.799 | 0.817 | 0.764 | 0.753 | 0.774 | 0.9   | 0.801 |



|    |     |      |     |    |    |    |     |       |       |       |       |       |       |       |
|----|-----|------|-----|----|----|----|-----|-------|-------|-------|-------|-------|-------|-------|
| 40 | 4   | 2    | 0.5 | 40 | 80 | 5  | 125 | 0.799 | 0.817 | 0.764 | 0.753 | 0.774 | 0.9   | 0.801 |
| 30 | 0.5 | 1    | 1   | 5  | 30 | 10 | 45  | 0.8   | 0.818 | 0.757 | 0.755 | 0.776 | 0.9   | 0.801 |
| 20 | 3   | 0.5  | 3   | 30 | 10 | 30 | 70  | 0.8   | 0.821 | 0.753 | 0.754 | 0.779 | 0.899 | 0.801 |
| 40 | 0.5 | 1    | 1   | 5  | 40 | 10 | 55  | 0.8   | 0.818 | 0.757 | 0.755 | 0.776 | 0.9   | 0.801 |
| 20 | 0.5 | 2    | 2   | 5  | 40 | 20 | 65  | 0.8   | 0.818 | 0.757 | 0.754 | 0.775 | 0.901 | 0.801 |
| 20 | 0.5 | 0.67 | 0.5 | 5  | 13 | 5  | 23  | 0.799 | 0.817 | 0.761 | 0.753 | 0.775 | 0.9   | 0.801 |
| 20 | 1.5 | 1    | 0.5 | 15 | 20 | 5  | 40  | 0.798 | 0.817 | 0.763 | 0.753 | 0.775 | 0.9   | 0.801 |
| 20 | 2   | 1    | 0.5 | 20 | 20 | 5  | 45  | 0.798 | 0.816 | 0.766 | 0.751 | 0.773 | 0.901 | 0.801 |
| 40 | 3   | 0.5  | 0.5 | 30 | 20 | 5  | 55  | 0.798 | 0.819 | 0.759 | 0.753 | 0.777 | 0.899 | 0.801 |
| 20 | 2   | 0.5  | 4   | 20 | 10 | 40 | 70  | 0.8   | 0.821 | 0.748 | 0.755 | 0.78  | 0.899 | 0.801 |
| 40 | 4   | 0.5  | 1   | 40 | 20 | 10 | 70  | 0.799 | 0.819 | 0.755 | 0.754 | 0.778 | 0.898 | 0.8   |
| 20 | 0.5 | 3    | 3   | 5  | 60 | 30 | 95  | 0.8   | 0.818 | 0.756 | 0.753 | 0.775 | 0.901 | 0.8   |
| 30 | 0.5 | 0.67 | 0.5 | 5  | 20 | 5  | 30  | 0.799 | 0.817 | 0.759 | 0.754 | 0.775 | 0.899 | 0.8   |
| 20 | 3   | 0.5  | 4   | 30 | 10 | 40 | 80  | 0.8   | 0.821 | 0.75  | 0.754 | 0.779 | 0.898 | 0.8   |
| 30 | 3   | 0.5  | 0.5 | 30 | 15 | 5  | 50  | 0.798 | 0.818 | 0.759 | 0.752 | 0.776 | 0.898 | 0.8   |
| 40 | 0.5 | 0.67 | 0.5 | 5  | 27 | 5  | 37  | 0.799 | 0.817 | 0.759 | 0.753 | 0.774 | 0.899 | 0.8   |
| 20 | 1   | 0.5  | 4   | 10 | 10 | 40 | 60  | 0.8   | 0.821 | 0.746 | 0.755 | 0.78  | 0.899 | 0.8   |
| 20 | 0.5 | 4    | 4   | 5  | 80 | 40 | 125 | 0.799 | 0.818 | 0.756 | 0.753 | 0.775 | 0.901 | 0.8   |
| 30 | 4   | 0.5  | 1   | 40 | 15 | 10 | 65  | 0.798 | 0.819 | 0.755 | 0.753 | 0.777 | 0.898 | 0.8   |
| 30 | 0.5 | 1.5  | 1.5 | 5  | 45 | 15 | 65  | 0.8   | 0.817 | 0.755 | 0.755 | 0.775 | 0.898 | 0.8   |
| 40 | 0.5 | 1.5  | 1.5 | 5  | 60 | 15 | 80  | 0.799 | 0.817 | 0.755 | 0.754 | 0.775 | 0.899 | 0.8   |
| 20 | 3   | 1    | 0.5 | 30 | 20 | 5  | 55  | 0.796 | 0.815 | 0.766 | 0.749 | 0.772 | 0.9   | 0.8   |
| 30 | 2   | 1.5  | 0.5 | 20 | 45 | 5  | 70  | 0.797 | 0.815 | 0.761 | 0.752 | 0.773 | 0.898 | 0.799 |
| 20 | 2   | 0.5  | 0.5 | 20 | 10 | 5  | 35  | 0.796 | 0.816 | 0.762 | 0.749 | 0.773 | 0.899 | 0.799 |
| 30 | 1   | 1    | 0.5 | 10 | 30 | 5  | 45  | 0.797 | 0.815 | 0.761 | 0.752 | 0.772 | 0.898 | 0.799 |
| 40 | 2   | 1.5  | 0.5 | 20 | 60 | 5  | 85  | 0.797 | 0.815 | 0.761 | 0.752 | 0.772 | 0.898 | 0.799 |
| 30 | 0.5 | 2    | 2   | 5  | 60 | 20 | 85  | 0.799 | 0.816 | 0.755 | 0.753 | 0.774 | 0.898 | 0.799 |
| 40 | 1   | 1    | 0.5 | 10 | 40 | 5  | 55  | 0.797 | 0.815 | 0.761 | 0.751 | 0.772 | 0.899 | 0.799 |
| 20 | 4   | 0.5  | 3   | 40 | 10 | 30 | 80  | 0.798 | 0.819 | 0.752 | 0.752 | 0.777 | 0.897 | 0.799 |
| 40 | 0.5 | 2    | 2   | 5  | 80 | 20 | 105 | 0.799 | 0.816 | 0.755 | 0.753 | 0.774 | 0.898 | 0.799 |
| 20 | 1   | 1    | 0.5 | 10 | 20 | 5  | 35  | 0.797 | 0.815 | 0.763 | 0.75  | 0.771 | 0.9   | 0.799 |

|    |      |      |      |    |     |    |     |       |       |       |       |       |       |       |
|----|------|------|------|----|-----|----|-----|-------|-------|-------|-------|-------|-------|-------|
| 30 | 0.5  | 0.75 | 0.5  | 5  | 22  | 5  | 32  | 0.798 | 0.815 | 0.758 | 0.752 | 0.773 | 0.898 | 0.799 |
| 30 | 0.5  | 1    | 0.75 | 5  | 30  | 8  | 42  | 0.798 | 0.815 | 0.758 | 0.752 | 0.773 | 0.898 | 0.799 |
| 30 | 3    | 2    | 0.5  | 30 | 60  | 5  | 95  | 0.797 | 0.815 | 0.762 | 0.751 | 0.772 | 0.898 | 0.799 |
| 40 | 0.5  | 0.75 | 0.5  | 5  | 30  | 5  | 40  | 0.798 | 0.815 | 0.758 | 0.752 | 0.773 | 0.898 | 0.799 |
| 40 | 3    | 2    | 0.5  | 30 | 80  | 5  | 115 | 0.797 | 0.814 | 0.762 | 0.751 | 0.772 | 0.898 | 0.799 |
| 40 | 0.5  | 1    | 0.75 | 5  | 40  | 8  | 52  | 0.798 | 0.815 | 0.758 | 0.752 | 0.773 | 0.898 | 0.799 |
| 20 | 4    | 0.5  | 4    | 40 | 10  | 40 | 90  | 0.798 | 0.819 | 0.749 | 0.753 | 0.778 | 0.897 | 0.799 |
| 20 | 0.5  | 0.5  | 4    | 5  | 10  | 40 | 55  | 0.799 | 0.82  | 0.743 | 0.754 | 0.778 | 0.899 | 0.799 |
| 20 | 0.75 | 1    | 0.5  | 8  | 20  | 5  | 32  | 0.797 | 0.815 | 0.76  | 0.751 | 0.772 | 0.898 | 0.799 |
| 20 | 0.5  | 0.75 | 0.5  | 5  | 15  | 5  | 25  | 0.797 | 0.815 | 0.76  | 0.75  | 0.771 | 0.9   | 0.799 |
| 20 | 4    | 2    | 0.5  | 40 | 40  | 5  | 85  | 0.795 | 0.814 | 0.765 | 0.748 | 0.77  | 0.899 | 0.799 |
| 20 | 2    | 1.5  | 0.5  | 20 | 30  | 5  | 55  | 0.796 | 0.814 | 0.763 | 0.749 | 0.77  | 0.899 | 0.799 |
| 30 | 0.5  | 3    | 3    | 5  | 90  | 30 | 125 | 0.798 | 0.816 | 0.753 | 0.753 | 0.774 | 0.897 | 0.799 |
| 40 | 0.5  | 3    | 3    | 5  | 120 | 30 | 155 | 0.798 | 0.816 | 0.753 | 0.753 | 0.773 | 0.897 | 0.798 |
| 30 | 0.5  | 4    | 4    | 5  | 120 | 40 | 165 | 0.798 | 0.816 | 0.754 | 0.753 | 0.773 | 0.897 | 0.798 |
| 20 | 3    | 0.5  | 1    | 30 | 10  | 10 | 50  | 0.796 | 0.816 | 0.758 | 0.749 | 0.774 | 0.897 | 0.798 |
| 40 | 0.5  | 4    | 4    | 5  | 160 | 40 | 205 | 0.798 | 0.815 | 0.754 | 0.753 | 0.773 | 0.897 | 0.798 |
| 20 | 0.5  | 2    | 1.5  | 5  | 40  | 15 | 60  | 0.797 | 0.815 | 0.757 | 0.75  | 0.772 | 0.899 | 0.798 |
| 20 | 1.5  | 1.5  | 0.5  | 15 | 30  | 5  | 50  | 0.796 | 0.814 | 0.761 | 0.75  | 0.771 | 0.896 | 0.798 |
| 20 | 0.5  | 1.5  | 1    | 5  | 30  | 10 | 45  | 0.796 | 0.814 | 0.757 | 0.75  | 0.771 | 0.899 | 0.798 |
| 20 | 4    | 0.5  | 2    | 40 | 10  | 20 | 70  | 0.796 | 0.817 | 0.753 | 0.75  | 0.775 | 0.897 | 0.798 |
| 30 | 0.75 | 1    | 0.5  | 8  | 30  | 5  | 42  | 0.796 | 0.814 | 0.759 | 0.751 | 0.771 | 0.896 | 0.798 |
| 20 | 3    | 2    | 0.5  | 30 | 40  | 5  | 75  | 0.795 | 0.813 | 0.763 | 0.748 | 0.77  | 0.898 | 0.798 |
| 40 | 0.75 | 1    | 0.5  | 8  | 40  | 5  | 52  | 0.796 | 0.813 | 0.759 | 0.751 | 0.771 | 0.896 | 0.798 |
| 40 | 4    | 0.5  | 0.5  | 40 | 20  | 5  | 65  | 0.795 | 0.816 | 0.755 | 0.75  | 0.774 | 0.895 | 0.797 |
| 20 | 0.5  | 4    | 3    | 5  | 80  | 30 | 115 | 0.796 | 0.814 | 0.754 | 0.75  | 0.771 | 0.898 | 0.797 |
| 20 | 4    | 1    | 0.5  | 40 | 20  | 5  | 65  | 0.794 | 0.813 | 0.764 | 0.746 | 0.769 | 0.898 | 0.797 |
| 30 | 4    | 3    | 0.5  | 40 | 90  | 5  | 135 | 0.795 | 0.812 | 0.762 | 0.749 | 0.769 | 0.896 | 0.797 |
| 40 | 4    | 3    | 0.5  | 40 | 120 | 5  | 165 | 0.795 | 0.812 | 0.762 | 0.749 | 0.769 | 0.896 | 0.797 |
| 20 | 0.5  | 1    | 0.5  | 5  | 20  | 5  | 30  | 0.795 | 0.813 | 0.758 | 0.749 | 0.77  | 0.897 | 0.797 |
| 30 | 4    | 0.5  | 0.5  | 40 | 15  | 5  | 60  | 0.795 | 0.815 | 0.754 | 0.749 | 0.773 | 0.895 | 0.797 |

|    |     |     |     |    |     |    |     |       |       |       |       |       |       |       |
|----|-----|-----|-----|----|-----|----|-----|-------|-------|-------|-------|-------|-------|-------|
| 30 | 1.5 | 1.5 | 0.5 | 15 | 45  | 5  | 65  | 0.795 | 0.812 | 0.759 | 0.749 | 0.77  | 0.895 | 0.797 |
| 40 | 1.5 | 1.5 | 0.5 | 15 | 60  | 5  | 80  | 0.795 | 0.812 | 0.759 | 0.749 | 0.77  | 0.895 | 0.797 |
| 20 | 0.5 | 3   | 2   | 5  | 60  | 20 | 85  | 0.796 | 0.813 | 0.754 | 0.749 | 0.77  | 0.897 | 0.797 |
| 20 | 4   | 3   | 0.5 | 40 | 60  | 5  | 105 | 0.793 | 0.811 | 0.763 | 0.746 | 0.767 | 0.896 | 0.796 |
| 20 | 2   | 2   | 0.5 | 20 | 40  | 5  | 65  | 0.793 | 0.811 | 0.761 | 0.747 | 0.767 | 0.897 | 0.796 |
| 30 | 0.5 | 2   | 1.5 | 5  | 60  | 15 | 80  | 0.795 | 0.812 | 0.754 | 0.75  | 0.77  | 0.895 | 0.796 |
| 30 | 2   | 2   | 0.5 | 20 | 60  | 5  | 85  | 0.794 | 0.811 | 0.759 | 0.748 | 0.768 | 0.895 | 0.796 |
| 40 | 0.5 | 2   | 1.5 | 5  | 80  | 15 | 100 | 0.795 | 0.812 | 0.754 | 0.749 | 0.769 | 0.895 | 0.796 |
| 40 | 2   | 2   | 0.5 | 20 | 80  | 5  | 105 | 0.794 | 0.811 | 0.759 | 0.748 | 0.768 | 0.895 | 0.796 |
| 30 | 0.5 | 1.5 | 1   | 5  | 45  | 10 | 60  | 0.795 | 0.812 | 0.755 | 0.749 | 0.769 | 0.895 | 0.796 |
| 40 | 0.5 | 1.5 | 1   | 5  | 60  | 10 | 75  | 0.794 | 0.811 | 0.755 | 0.749 | 0.769 | 0.895 | 0.796 |
| 20 | 1.5 | 2   | 0.5 | 15 | 40  | 5  | 60  | 0.793 | 0.811 | 0.758 | 0.747 | 0.768 | 0.894 | 0.795 |
| 20 | 1   | 1.5 | 0.5 | 10 | 30  | 5  | 45  | 0.793 | 0.81  | 0.759 | 0.746 | 0.767 | 0.896 | 0.795 |
| 20 | 4   | 0.5 | 1   | 40 | 10  | 10 | 60  | 0.792 | 0.813 | 0.754 | 0.746 | 0.77  | 0.894 | 0.795 |
| 20 | 0.5 | 2   | 1   | 5  | 40  | 10 | 55  | 0.793 | 0.811 | 0.755 | 0.747 | 0.767 | 0.896 | 0.795 |
| 30 | 3   | 3   | 0.5 | 30 | 90  | 5  | 125 | 0.792 | 0.809 | 0.76  | 0.746 | 0.766 | 0.894 | 0.795 |
| 30 | 0.5 | 1   | 0.5 | 5  | 30  | 5  | 40  | 0.793 | 0.81  | 0.756 | 0.747 | 0.767 | 0.894 | 0.795 |
| 20 | 3   | 3   | 0.5 | 30 | 60  | 5  | 95  | 0.792 | 0.809 | 0.761 | 0.745 | 0.765 | 0.895 | 0.795 |
| 30 | 0.5 | 4   | 3   | 5  | 120 | 30 | 155 | 0.794 | 0.811 | 0.752 | 0.748 | 0.768 | 0.894 | 0.795 |
| 20 | 3   | 0.5 | 0.5 | 30 | 10  | 5  | 45  | 0.791 | 0.811 | 0.759 | 0.744 | 0.767 | 0.895 | 0.794 |
| 40 | 3   | 3   | 0.5 | 30 | 120 | 5  | 155 | 0.792 | 0.809 | 0.76  | 0.746 | 0.766 | 0.894 | 0.794 |
| 40 | 0.5 | 1   | 0.5 | 5  | 40  | 5  | 50  | 0.793 | 0.81  | 0.756 | 0.747 | 0.767 | 0.894 | 0.794 |
| 40 | 0.5 | 4   | 3   | 5  | 160 | 30 | 195 | 0.794 | 0.811 | 0.752 | 0.748 | 0.768 | 0.894 | 0.794 |
| 20 | 4   | 4   | 0.5 | 40 | 80  | 5  | 125 | 0.791 | 0.809 | 0.761 | 0.744 | 0.765 | 0.895 | 0.794 |
| 30 | 4   | 4   | 0.5 | 40 | 120 | 5  | 165 | 0.792 | 0.809 | 0.759 | 0.746 | 0.766 | 0.893 | 0.794 |
| 40 | 4   | 4   | 0.5 | 40 | 160 | 5  | 205 | 0.792 | 0.809 | 0.759 | 0.746 | 0.766 | 0.894 | 0.794 |
| 30 | 1   | 1.5 | 0.5 | 10 | 45  | 5  | 60  | 0.792 | 0.809 | 0.757 | 0.746 | 0.766 | 0.893 | 0.794 |
| 40 | 1   | 1.5 | 0.5 | 10 | 60  | 5  | 75  | 0.792 | 0.809 | 0.757 | 0.746 | 0.766 | 0.893 | 0.794 |
| 30 | 0.5 | 3   | 2   | 5  | 90  | 20 | 115 | 0.793 | 0.81  | 0.752 | 0.748 | 0.767 | 0.893 | 0.794 |
| 30 | 1.5 | 2   | 0.5 | 15 | 60  | 5  | 80  | 0.792 | 0.809 | 0.757 | 0.746 | 0.766 | 0.892 | 0.794 |
| 40 | 0.5 | 3   | 2   | 5  | 120 | 20 | 145 | 0.793 | 0.81  | 0.752 | 0.747 | 0.767 | 0.893 | 0.794 |

|    |     |     |     |    |     |    |     |       |       |       |       |       |       |       |
|----|-----|-----|-----|----|-----|----|-----|-------|-------|-------|-------|-------|-------|-------|
| 40 | 1.5 | 2   | 0.5 | 15 | 80  | 5  | 100 | 0.792 | 0.808 | 0.757 | 0.746 | 0.766 | 0.893 | 0.794 |
| 20 | 0.5 | 4   | 2   | 5  | 80  | 20 | 105 | 0.792 | 0.809 | 0.752 | 0.746 | 0.766 | 0.894 | 0.793 |
| 20 | 0.5 | 1.5 | 0.5 | 5  | 30  | 5  | 40  | 0.791 | 0.809 | 0.753 | 0.746 | 0.766 | 0.892 | 0.793 |
| 20 | 2   | 3   | 0.5 | 20 | 60  | 5  | 85  | 0.789 | 0.807 | 0.757 | 0.743 | 0.763 | 0.892 | 0.792 |
| 20 | 1   | 2   | 0.5 | 10 | 40  | 5  | 55  | 0.79  | 0.807 | 0.755 | 0.743 | 0.764 | 0.892 | 0.792 |
| 30 | 0.5 | 2   | 1   | 5  | 60  | 10 | 75  | 0.79  | 0.807 | 0.753 | 0.745 | 0.764 | 0.891 | 0.792 |
| 20 | 3   | 4   | 0.5 | 30 | 80  | 5  | 115 | 0.789 | 0.806 | 0.757 | 0.743 | 0.763 | 0.892 | 0.792 |
| 40 | 0.5 | 2   | 1   | 5  | 80  | 10 | 95  | 0.79  | 0.807 | 0.753 | 0.744 | 0.764 | 0.891 | 0.792 |
| 20 | 4   | 0.5 | 0.5 | 40 | 10  | 5  | 55  | 0.788 | 0.808 | 0.755 | 0.741 | 0.764 | 0.891 | 0.791 |
| 30 | 3   | 4   | 0.5 | 30 | 120 | 5  | 155 | 0.789 | 0.805 | 0.756 | 0.743 | 0.762 | 0.89  | 0.791 |
| 30 | 2   | 3   | 0.5 | 20 | 90  | 5  | 115 | 0.789 | 0.805 | 0.756 | 0.743 | 0.762 | 0.89  | 0.791 |
| 40 | 3   | 4   | 0.5 | 30 | 160 | 5  | 195 | 0.789 | 0.805 | 0.756 | 0.743 | 0.762 | 0.89  | 0.791 |
| 40 | 2   | 3   | 0.5 | 20 | 120 | 5  | 145 | 0.789 | 0.805 | 0.756 | 0.742 | 0.762 | 0.89  | 0.791 |
| 20 | 0.5 | 3   | 1   | 5  | 60  | 10 | 75  | 0.789 | 0.806 | 0.751 | 0.743 | 0.763 | 0.891 | 0.791 |
| 20 | 0.5 | 2   | 0.5 | 5  | 40  | 5  | 50  | 0.789 | 0.806 | 0.752 | 0.743 | 0.763 | 0.89  | 0.79  |
| 30 | 1   | 2   | 0.5 | 10 | 60  | 5  | 75  | 0.788 | 0.805 | 0.753 | 0.742 | 0.762 | 0.889 | 0.79  |
| 30 | 0.5 | 4   | 2   | 5  | 120 | 20 | 145 | 0.789 | 0.805 | 0.75  | 0.743 | 0.762 | 0.889 | 0.79  |
| 40 | 1   | 2   | 0.5 | 10 | 80  | 5  | 95  | 0.788 | 0.804 | 0.753 | 0.742 | 0.761 | 0.889 | 0.79  |
| 40 | 0.5 | 4   | 2   | 5  | 160 | 20 | 185 | 0.788 | 0.805 | 0.75  | 0.743 | 0.762 | 0.889 | 0.79  |
| 30 | 0.5 | 1.5 | 0.5 | 5  | 45  | 5  | 55  | 0.788 | 0.805 | 0.752 | 0.743 | 0.762 | 0.889 | 0.79  |
| 40 | 0.5 | 1.5 | 0.5 | 5  | 60  | 5  | 70  | 0.788 | 0.804 | 0.752 | 0.742 | 0.762 | 0.889 | 0.789 |
| 20 | 2   | 4   | 0.5 | 20 | 80  | 5  | 105 | 0.787 | 0.804 | 0.754 | 0.74  | 0.76  | 0.89  | 0.789 |
| 20 | 0.5 | 4   | 1   | 5  | 80  | 10 | 95  | 0.787 | 0.803 | 0.75  | 0.74  | 0.76  | 0.889 | 0.788 |
| 20 | 1   | 3   | 0.5 | 10 | 60  | 5  | 75  | 0.786 | 0.803 | 0.753 | 0.739 | 0.759 | 0.889 | 0.788 |
| 30 | 2   | 4   | 0.5 | 20 | 120 | 5  | 145 | 0.786 | 0.802 | 0.753 | 0.74  | 0.758 | 0.887 | 0.788 |
| 40 | 2   | 4   | 0.5 | 20 | 160 | 5  | 185 | 0.785 | 0.802 | 0.753 | 0.739 | 0.758 | 0.887 | 0.787 |
| 20 | 0.5 | 3   | 0.5 | 5  | 60  | 5  | 70  | 0.785 | 0.802 | 0.749 | 0.739 | 0.759 | 0.887 | 0.787 |
| 30 | 0.5 | 3   | 1   | 5  | 90  | 10 | 105 | 0.785 | 0.801 | 0.749 | 0.74  | 0.759 | 0.886 | 0.787 |
| 40 | 0.5 | 3   | 1   | 5  | 120 | 10 | 135 | 0.785 | 0.801 | 0.749 | 0.74  | 0.758 | 0.886 | 0.787 |
| 30 | 0.5 | 2   | 0.5 | 5  | 60  | 5  | 70  | 0.785 | 0.801 | 0.75  | 0.739 | 0.758 | 0.886 | 0.786 |
| 40 | 0.5 | 2   | 0.5 | 5  | 80  | 5  | 90  | 0.785 | 0.801 | 0.75  | 0.739 | 0.758 | 0.886 | 0.786 |

|    |     |   |     |    |     |    |     |       |       |       |       |       |       |       |
|----|-----|---|-----|----|-----|----|-----|-------|-------|-------|-------|-------|-------|-------|
| 20 | 1   | 4 | 0.5 | 10 | 80  | 5  | 95  | 0.784 | 0.8   | 0.749 | 0.738 | 0.757 | 0.886 | 0.786 |
| 30 | 1   | 3 | 0.5 | 10 | 90  | 5  | 105 | 0.784 | 0.8   | 0.751 | 0.738 | 0.757 | 0.885 | 0.786 |
| 40 | 1   | 3 | 0.5 | 10 | 120 | 5  | 135 | 0.784 | 0.8   | 0.751 | 0.738 | 0.756 | 0.885 | 0.786 |
| 20 | 0.5 | 4 | 0.5 | 5  | 80  | 5  | 90  | 0.784 | 0.8   | 0.748 | 0.738 | 0.757 | 0.885 | 0.785 |
| 30 | 0.5 | 4 | 1   | 5  | 120 | 10 | 135 | 0.783 | 0.798 | 0.748 | 0.737 | 0.755 | 0.884 | 0.784 |
| 40 | 0.5 | 4 | 1   | 5  | 160 | 10 | 175 | 0.782 | 0.798 | 0.748 | 0.737 | 0.755 | 0.884 | 0.784 |
| 30 | 1   | 4 | 0.5 | 10 | 120 | 5  | 135 | 0.781 | 0.797 | 0.748 | 0.735 | 0.754 | 0.883 | 0.783 |
| 40 | 1   | 4 | 0.5 | 10 | 160 | 5  | 175 | 0.781 | 0.797 | 0.748 | 0.735 | 0.753 | 0.882 | 0.783 |
| 30 | 0.5 | 3 | 0.5 | 5  | 90  | 5  | 100 | 0.781 | 0.797 | 0.747 | 0.735 | 0.753 | 0.882 | 0.783 |
| 40 | 0.5 | 3 | 0.5 | 5  | 120 | 5  | 130 | 0.781 | 0.796 | 0.747 | 0.735 | 0.753 | 0.882 | 0.782 |
| 30 | 0.5 | 4 | 0.5 | 5  | 120 | 5  | 130 | 0.779 | 0.795 | 0.746 | 0.733 | 0.751 | 0.88  | 0.781 |
| 40 | 0.5 | 4 | 0.5 | 5  | 160 | 5  | 170 | 0.779 | 0.794 | 0.746 | 0.733 | 0.751 | 0.88  | 0.781 |

\*Note for the analysis the subtests were weighted such that the lowest received 0.5 points per word and the total SHARE-Cog score was rounded to the nearest whole number. For presentation in the table above the scorings are ordered from the highest to the lowest average AUC value, are shaded by the total number of animals in the verbal fluency task and the chosen SHARE-Cog weighting is coloured red.

**Table S5.** Sensitivity Analysis of SHARE-Cog for different ways of defining the cognitive diagnostic groups.

| Comparisons                                      | Primary analysis                                                                                                                 | Sensitivity analysis 1                                                                                                         | Sensitivity analysis 2                                                                                                                                                                    | Sensitivity analysis 3                                                                                                                                                                                                                                                                                                                                                                                                                                                                                                                     |
|--------------------------------------------------|----------------------------------------------------------------------------------------------------------------------------------|--------------------------------------------------------------------------------------------------------------------------------|-------------------------------------------------------------------------------------------------------------------------------------------------------------------------------------------|--------------------------------------------------------------------------------------------------------------------------------------------------------------------------------------------------------------------------------------------------------------------------------------------------------------------------------------------------------------------------------------------------------------------------------------------------------------------------------------------------------------------------------------------|
| <b>Methods for defining cognitive categories</b> | <b>3 IADLs used:</b> Telephone; medication; money<br><b>Positive memory disease diagnosis question used for MCI and dementia</b> | <b>3 IADLs used:</b> Telephone; medication; money<br><b>Positive memory disease diagnosis question excluded for analysis 3</b> | <b>9 IADLs used:</b><br>Telephone; medication; money;<br>Using a map; meal preparation;<br>Work house/garden<br>Doing laundry<br>Can leave house/travel independently<br>Grocery shopping | <b>9 IADLs used with additional qualifying criteria:</b><br>Telephone; medication; money;<br>Using a map; meal preparation;<br><b>Work house/garden [IF No difficulty: stooping, kneeling, or crouching]</b><br><b>Doing laundry [IF No difficulty: stooping, kneeling, or crouching]</b><br><b>Can leave house/travel independently [IF No difficulty: walking 100m]</b><br><b>Grocery shopping [IF No difficulty: walking 100m AND No difficulty: Lifting or carrying weights over 10 pounds/5 kilos, like a heavy bag of groceries]</b> |
| <b>Number by group</b><br>Dementia               | <b>Numbers</b><br>335                                                                                                            | <b>Numbers*</b><br>186                                                                                                         | <b>Numbers*</b><br>689                                                                                                                                                                    | <b>Numbers*</b><br>593                                                                                                                                                                                                                                                                                                                                                                                                                                                                                                                     |

|                          |                     |                     |                     |                     |
|--------------------------|---------------------|---------------------|---------------------|---------------------|
| MCI                      | 778                 | 611                 | 529                 | 601                 |
| SC                       | 4957                | 4957                | 3894                | 4294                |
| NC                       | 14682               | 14682               | 12915               | 13661               |
| <b>AUC for SHARE-Cog</b> | <b>AUC (95% CI)</b> | <b>AUC (95% CI)</b> | <b>AUC (95% CI)</b> | <b>AUC (95% CI)</b> |
| D_MCI_v_SMC_NC           | 0.81 (0.8-0.82)     | 0.8 (0.79-0.82)     | 0.84 (0.82-0.85)    | 0.83 (0.82-0.84)    |
| (D+MCI) vs (NC)          | 0.83 (0.82-0.84)    | 0.83 (0.81-0.84)    | 0.85 (0.84-0.86)    | 0.85 (0.83-0.86)    |
| MCI vs D                 | 0.76 (0.72-0.79)    | 0.76 (0.72-0.8)     | 0.71 (0.68-0.74)    | 0.73 (0.7-0.76)     |
| MCI vs (SMC+NC)          | 0.77 (0.75-0.78)    | 0.77 (0.75-0.79)    | 0.77 (0.75-0.79)    | 0.76 (0.74-0.78)    |
| MCI vs NC                | 0.79 (0.77-0.81)    | 0.79 (0.77-0.81)    | 0.79 (0.77-0.81)    | 0.78 (0.76-0.8)     |
| D vs (MCI+ SMC+NC)       | 0.91 (0.89-0.92)    | 0.92 (0.9-0.94)     | 0.88 (0.87-0.9)     | 0.89 (0.88-0.9)     |

\*Note the total number of participants in the sensitivity analyses are different since there will be a different number of people with unclear/excluded diagnostic categories (see Table S2 for further details).

**Table S6.** Results from the covariate-adjusted ROC curves of the SHARE-Cog including the adjusted area under the curve (AAUC), the regression coefficients (*p*-values) for each of the covariate levels and the R<sup>2</sup> value of the covariates combined.

| Comparison          | AAUC (95% CI)    | (Intercept) | Age: 75-84     | Age 85+        | Education: medium | Education: high | Female sex    | Countries*              | R <sup>2</sup> |
|---------------------|------------------|-------------|----------------|----------------|-------------------|-----------------|---------------|-------------------------|----------------|
| (D+MCI) vs (SCI+NC) | 0.80 (0.79-0.81) | 19.60       | -6.42 (<0.001) | -9.91 (<0.001) | 3.68 (<0.001)     | 8.83 (<0.001)   | 0.70 (0.224)  | (0 with <i>p</i> ≤0.05) | 0.283          |
| (D+MCI) vs (NC)     | 0.82 (0.80-0.83) | 19.60       | -6.42 (<0.001) | -9.91 (<0.001) | 3.68 (<0.001)     | 8.83 (<0.001)   | 0.70 (0.224)  | (0 with <i>p</i> ≤0.05) | 0.283          |
| MCI vs D            | 0.73 (0.69-0.77) | 16.10       | -3.62 (0.002)  | -6.12 (<0.001) | 1.52 (0.212)      | 6.03 (<0.001)   | -1.23 (0.219) | (1 with <i>p</i> ≤0.05) | 0.202          |
| MCI vs (SMC+NC)     | 0.76 (0.74-0.78) | 21.17       | -6.20 (<0.001) | -9.13 (<0.001) | 3.99 (<0.001)     | 9.46 (<0.001)   | 1.47 (0.024)  | (1 with <i>p</i> ≤0.05) | 0.333          |
| MCI vs NC           | 0.78 (0.76-0.80) | 21.17       | -6.20 (<0.001) | -9.13 (<0.001) | 3.99 (<0.001)     | 9.46 (<0.001)   | 1.47 (0.024)  | (1 with <i>p</i> ≤0.05) | 0.333          |
| D vs (MCI+ SMC+NC)  | 0.90 (0.88-0.92) | 16.10       | -3.62 (0.002)  | -6.12 (<0.001) | 1.52 (0.212)      | 6.03 (<0.001)   | -1.23 (0.219) | (1 with <i>p</i> ≤0.05) | 0.202          |

\*There were 19 countries included in total. Taking Austria as the reference country, none of the other 18 countries has a statistically significant impact on the diagnostic accuracy of the SHARE-Cog for (D+MCI) vs (SCI+NC) or (D+MCI) vs (NC) (i.e. all 18 *p*-values >0.05). Only Denmark -4.77 (*p*=0.029) [for MCI\_v\_D and D\_v\_MCI\_SMC\_NC] and Italy -3.16 (*p*=0.024) [for MCI\_v\_SMC\_NC and MCI\_v\_NC] had marginally statistically significant results (at *p*≤0.05).
